# Supplementary material for: CeO2-Blended Cellulose Triacetate Mixed-Matrix Membranes for Selective CO2 Separation
Source: MDPI journal article supplement (doi:10.3390/membranes11080632), 2021-08-17
Supplement: s1 [file s1]

Supplementary Information

# CeO<sub>2</sub>-Blended Cellulose Triacetate Mixed-Matrix Membranes for Selective CO<sub>2</sub> Separation

Chhabilal Regmi <sup>a,\*</sup>, Saeed Ashtiani <sup>a</sup>, Zdeněk Sofer <sup>b</sup>, Zdeněk Hrdlička <sup>c</sup>, Filip Průša <sup>d</sup>, Ondřej Vopička <sup>a</sup> and Karel Friess <sup>a,\*</sup>

<sup>a</sup> Department of Physical Chemistry, University of Chemistry and Technology, Technická 5, 16628 Prague, Czech Republic

<sup>b</sup> Department of Inorganic Chemistry, University of Chemistry and Technology, Technická 5, 16628 Prague, Czech Republic

<sup>c</sup> Department of Polymers, University of Chemistry and Technology, Technická 5, 16628 Prague, Czech Republic

<sup>d</sup> Department of Metals and Corrosion Engineering, University of Chemistry and Technology, Technická 5, 16628 Prague, Czech Republic

\* Correspondence: regmic@vscht.cz; friessk@vscht.cz

## 1. Results

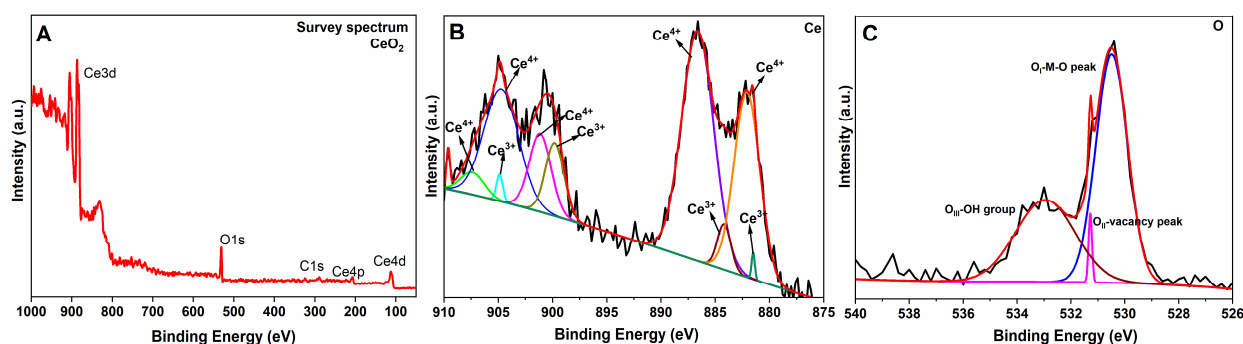

**Figure S1.** XPS spectrum of the CeO<sub>2</sub> nanoparticles: (A) survey spectrum, (B) Ce3d, and (C) O1s.

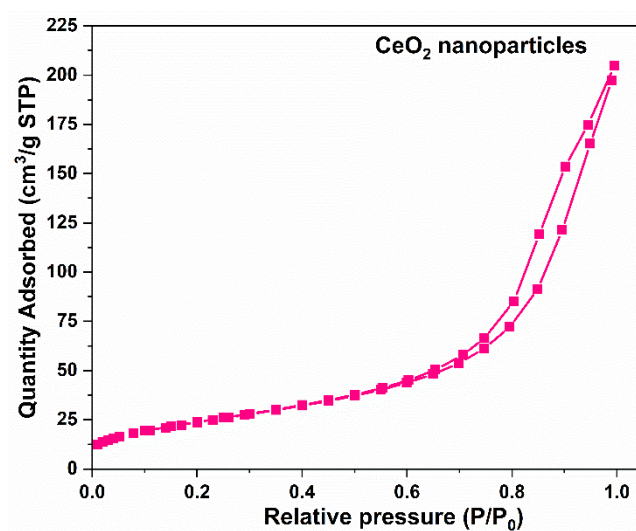

**Figure S2** BET surface area of CeO<sub>2</sub> nanoparticles.

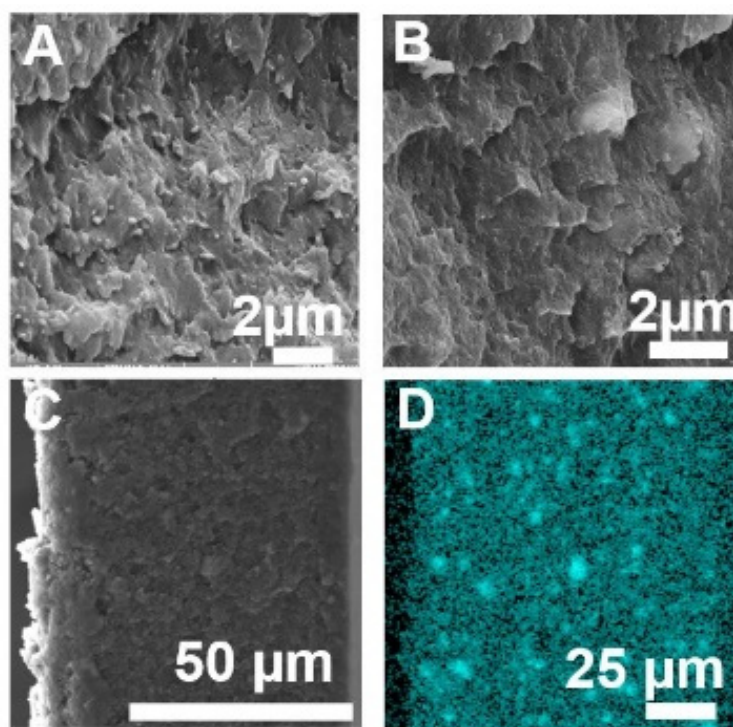

**Figure S3** SEM images of the magnified portion of the cross-section of; A) CTA-CeO<sub>2</sub> (0.64) : B) CTA-CeO<sub>2</sub> (0.9) showing the formation of the voids : C) portion of cross-section of CTA-CeO<sub>2</sub> (0.64) for EDS mapping: and D)Element Ce mapping over the cross-section of image in C showing the homogeneous distribution of Ce.

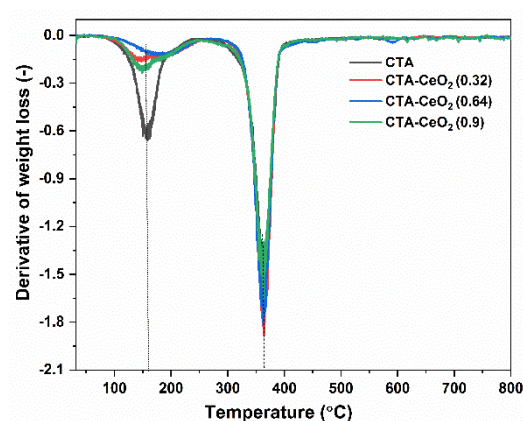

**Figure S4.** DTG plot for pristine and CeO<sub>2</sub>-loaded CTA membranes.

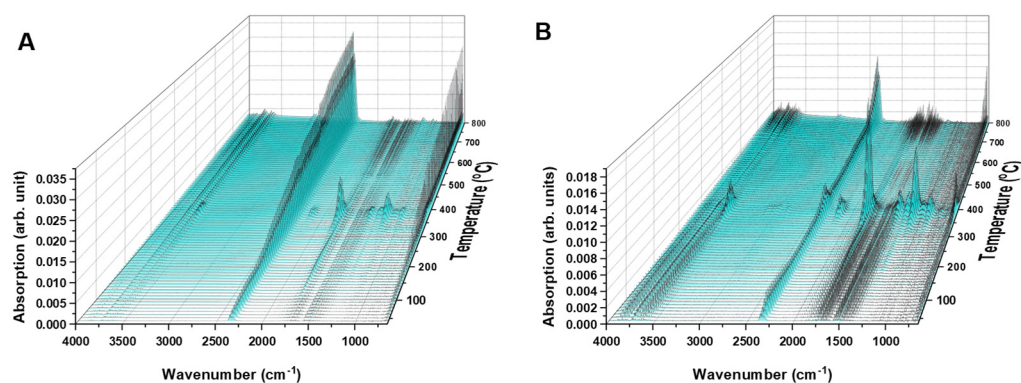

**Figure S5.** FTIR spectra of the product from samples measured during TGA measurement: (A) CTA, (B) CTA-CeO<sub>2</sub> (0.64).

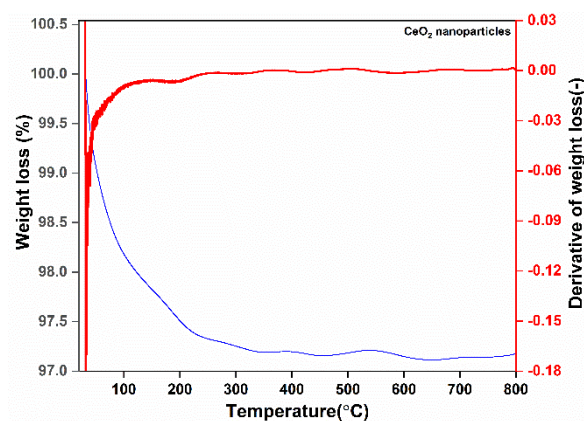

**Figure S6.** TGA-DTG thermogram for CeO<sub>2</sub> nanoparticles.

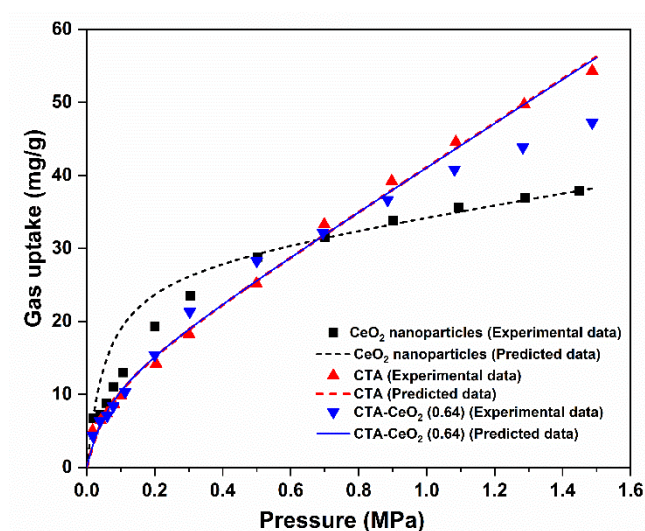

**Figure S7.** Sorption isotherms of CO<sub>2</sub> in pristine and CTA-CeO<sub>2</sub> MMMs (filled symbol indicates the experimental data, whereas the dashed/solid line indicates the value predicted using the DMS model).

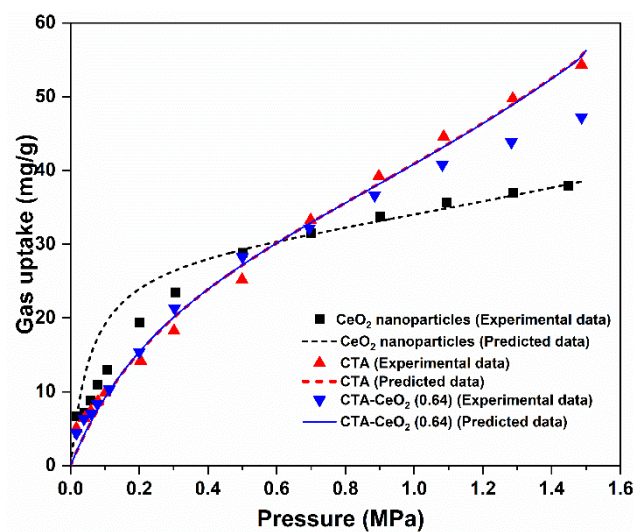

**Figure S8.** Sorption isotherms of CO<sub>2</sub> in pristine and CTA–CeO<sub>2</sub> MMMs (filled symbol indicates the experimental data, whereas the dashed/solid line indicates the value predicted using the GAB model).

**Table S1.** Fitting parameters for DMS and GAB models for CO<sub>2</sub> gas sorption.

| Samples                     | Fitting Parameters (DMS Model) |                |       |                | Fitting Parameters (GAB Model) |          |      |                |
|-----------------------------|--------------------------------|----------------|-------|----------------|--------------------------------|----------|------|----------------|
|                             | k <sub>D</sub>                 | C <sub>H</sub> | b     | R <sup>2</sup> | <i>v</i> <sub>m</sub>          | <i>h</i> | P*   | R <sup>2</sup> |
| CTA                         | 29.87                          | 11.92          | 16.17 | 0.99           | 35.80                          | 11.23    | 3.51 | 0.99           |
| CeO <sub>2</sub> NP         | 7.30                           | 28.37          | 18.03 | 0.99           | 29.61                          | 101.14   | 5.88 | 0.99           |
| CTA-CeO <sub>2</sub> (0.64) | 13.47                          | 32.02          | 3.88  | 0.99           | 39.35                          | 17.95    | 5.39 | 0.99           |

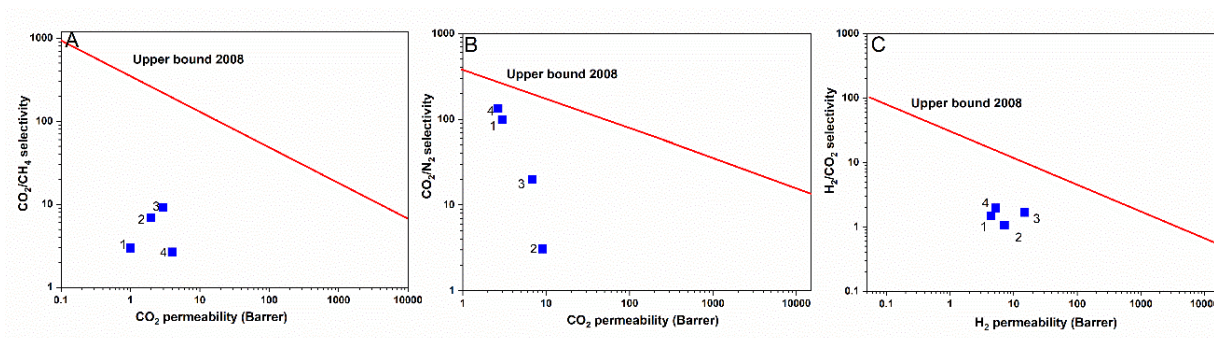

**Figure S9.** Robeson upper bound comparison for the different gas pairs in this study. The number in each symbol indicate the MMM samples: 1) CTA, 2) CTA–CeO<sub>2</sub> (0.32), 3) CTA–CeO<sub>2</sub> (0.64), and 4) CTA–CeO<sub>2</sub> (0.9).

**Publisher's Note:** MDPI stays neutral with regard to jurisdictional claims in published maps and institutional affiliations.

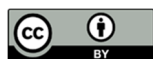

**Copyright:** © 2021 by the authors. Submitted for possible open access publication under the terms and conditions of the Creative Commons Attribution (CC BY) license (<https://creativecommons.org/licenses/by/4.0/>).
